# Supplementary material for: A multifunctional smart window: detecting ultraviolet radiation and regulating the spectrum automatically
Source: Royal Society of Chemistry journal article supplement (doi:10.1039/c9tc03398j), 2019-01-01
Supplement: c9tc03398j1.pdf [file c9tc03398j1.pdf]

**A multifunctional smart window: detecting the ultraviolet radiation and  
regulating the spectrum automatically**

Liangliang Wu,<sup>a</sup> Huajing Fang,<sup>\*b</sup> Cheng Zheng,<sup>a</sup> Qing Wang<sup>c</sup> and Hong Wang<sup>\*ad</sup>

*<sup>a</sup> School of Electronic and Information Engineering and State Key Laboratory for Mechanical Behavior of Materials, Xi'an Jiaotong University, Xi'an 710049, China.*

*<sup>b</sup> State Key Laboratory for Mechanical Behavior of Materials, School of Material Science and Engineering, Xi'an Jiaotong University, Xi'an 710049, China.*

*E-mail: [fanghj@xjtu.edu.cn](mailto:fanghj@xjtu.edu.cn)*

*<sup>c</sup> Department of Materials Science and Engineering, The Pennsylvania State University, University Park, Pennsylvania, 16802, USA.*

*<sup>d</sup> Department of Materials Science and Engineering & Shenzhen Engineering Research Center for Novel Electronic Information Materials and Devices, Southern University of Science and Technology, Shenzhen 518055, China.*

*E-mail: [wangh6@sustech.edu.cn](mailto:wangh6@sustech.edu.cn)*

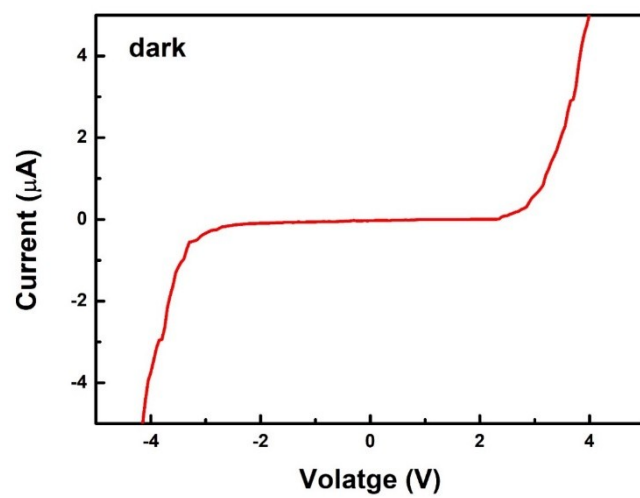

**Fig. S1** The current-voltage curve of the  $\text{TiO}_2$  photodetector under the dark.

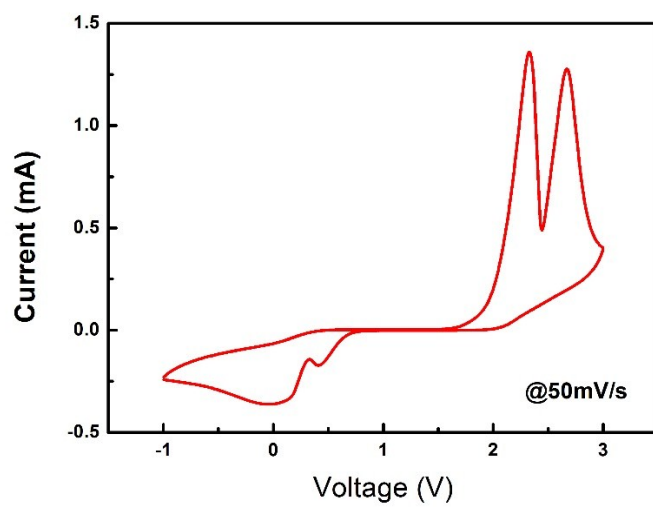

**Fig. S2** The cyclic voltammogram curve of the viologen hydrogel electrochromic device.

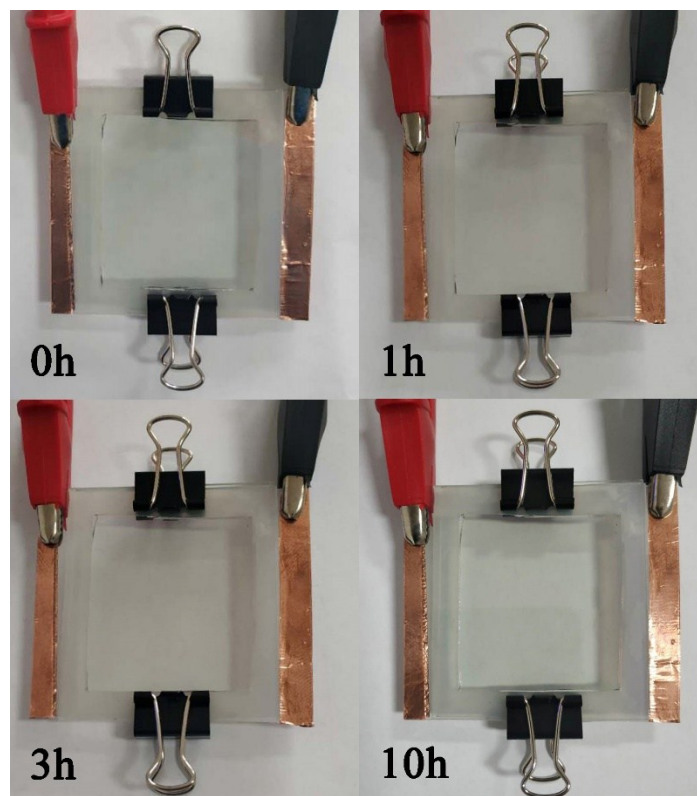

**Fig. S3** The photos of the aqueous hydrogel device with a bias of 2V for different time.

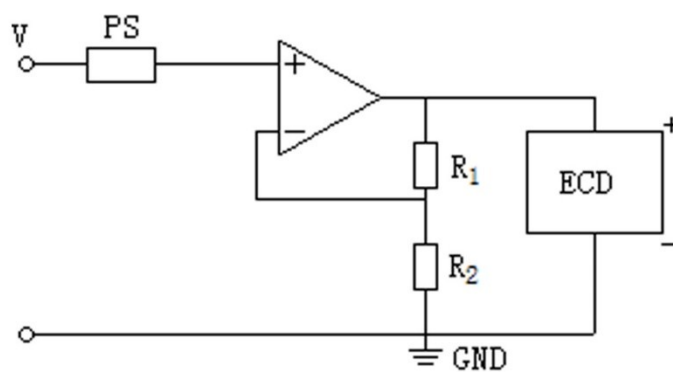

**Fig. S4** The external amplifier circuit of the integrated smart window.

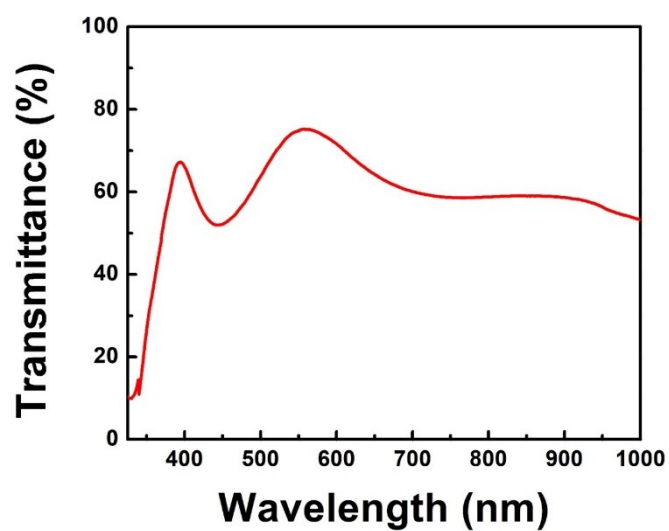

**Fig. S5** The transmittance of the integrated smart window.

**Video S1.** The integrated smart window changes color when it is exposed and blocked to the sun.
